# Supplementary material for: An urgent call for using real human urine in decentralized sanitation research and advancing protocols for preparing synthetic urine
Source: Frontiers journal article supplement (doi:10.3389/fenvs.2024.1367982), 2024-03-14
Supplement: Data_Sheet_1.PDF [file Data_Sheet_1.PDF]

Supplementary File for “An urgent call for using real human urine in decentralized sanitation research and advancing protocols for preparing synthetic urine”.

An analysis of urine research literature, specifically focusing on nutrient recovery, published over the past five years, shows an increasing trend in the use of synthetic urine (Supplementary Information, Fig. S1), with approximately 40% of these studies conducted exclusively with synthetic urine. Of particular concern is that among several publications that exclusively used synthetic urine, 21% referred to the type of urine used as “human urine” in the title of their publications.

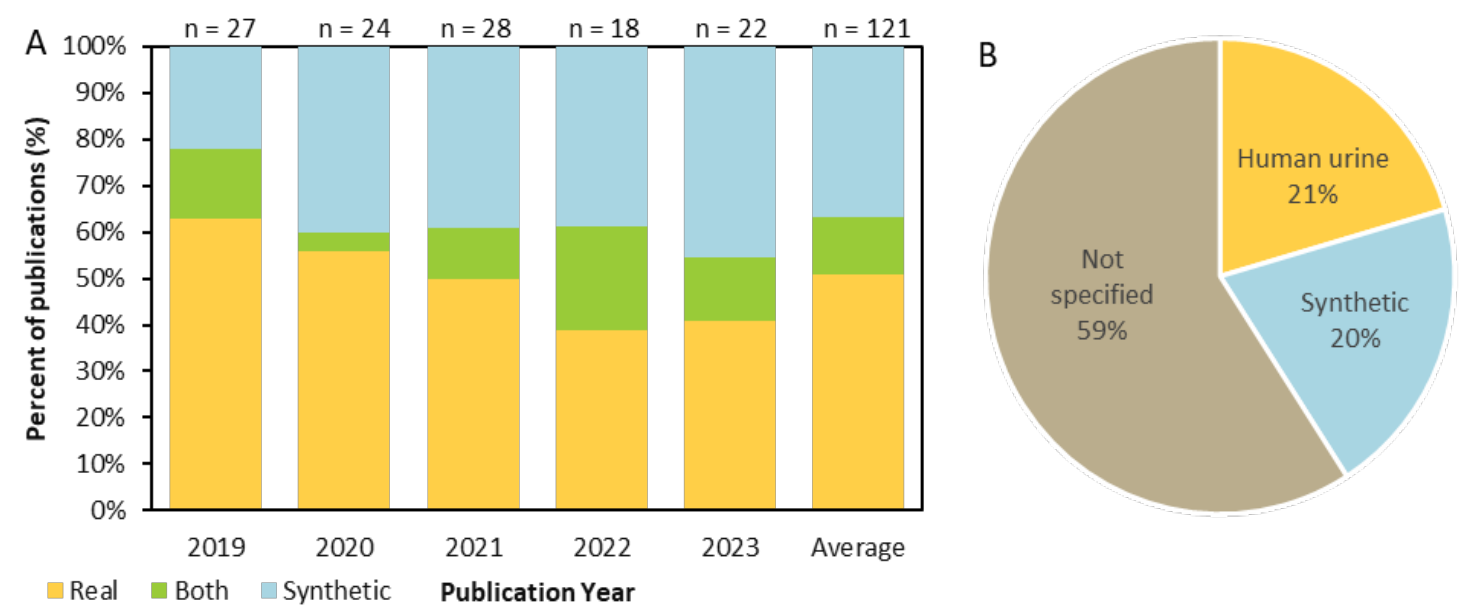

| Number | Year | Paper Title                                                                                                                                                         | DOI                                                                                                                                     | Urine Type (Real or Synthetic) | Urine typology | Was typology explicitly stated? |
|--------|------|---------------------------------------------------------------------------------------------------------------------------------------------------------------------|-----------------------------------------------------------------------------------------------------------------------------------------|--------------------------------|----------------|---------------------------------|
| 1      | 2023 | Cyanobacteria cultivation on human urine for nutrients recovery                                                                                                     | <a href="https://doi.org/10.1016/j.algal.2023.103064">https://doi.org/10.1016/j.algal.2023.103064</a>                                   | Real                           | Hydrolyzed     | Yes                             |
| 2      | 2023 | Insights into the promotion of urine-diverting toilets based on the fertilizer efficiency of artificial phosphate ore recovered from source-separated urine         | <a href="https://doi.org/10.1016/j.resconrec.2022.106807">https://doi.org/10.1016/j.resconrec.2022.106807</a>                           | Synthetic                      | Fresh          | Yes                             |
| 3      | 2023 | The advantage of a two-stage nitrification method for fertilizer recovery from human urine                                                                          | <a href="https://doi.org/10.1016/j.watres.2023.119932">https://doi.org/10.1016/j.watres.2023.119932</a>                                 | Real                           | Hydrolyzed     | Yes                             |
| 4      | 2023 | Ammonia recovery from source-separated hydrolyzed urine via a dual-membrane distillation in-series process                                                          | <a href="https://doi.org/10.1016/j.cej.2023.144215">https://doi.org/10.1016/j.cej.2023.144215</a>                                       | Real                           | Hydrolyzed     | Yes                             |
| 5      | 2023 | Nutrient recovery from yellow water to soil-crop systems                                                                                                            | <a href="https://link.springer.com/article/10.1007/s11356-022-24058-6">https://link.springer.com/article/10.1007/s11356-022-24058-6</a> | Real                           | Not stated     | No                              |
| 6      | 2023 | An integrated strategy for nutrient harvesting from hydrolyzed human urine as high-purity products: Tracking of precipitation transformation and precise regulation | <a href="https://doi.org/10.1016/j.scitotenv.2022.158721">https://doi.org/10.1016/j.scitotenv.2022.158721</a>                           | Synthetic                      | Hydrolyzed     | Yes                             |
| 7      | 2023 | Simultaneous recovery of nutrients and water from human urine by a novel thermally activated peroxydisulfate and membrane distillation integrated system            | <a href="https://doi.org/10.1016/j.cej.2023.141548">https://doi.org/10.1016/j.cej.2023.141548</a>                                       | Real                           | Fresh          | Yes                             |
| 8      | 2023 | Concentrating stabilized human urine using eutectic freeze crystallization for liquid fertilizer production                                                         | <a href="https://doi.org/10.1016/j.watres.2023.119760">https://doi.org/10.1016/j.watres.2023.119760</a>                                 | Real and Synthetic             | Base stablized | Yes                             |
| 9      | 2023 | A novel approach for enhancing nitrogen and hydrogen recovery from urine in microbial electrochemical gas-permeable membrane system                                 | <a href="https://doi.org/10.1016/j.scitotenv.2023.161446">https://doi.org/10.1016/j.scitotenv.2023.161446</a>                           | Synthetic                      | Fresh          | Yes                             |

|    |      |                                                                                                                                                                                                   |                                                                                                                                                       |                    |                                                 |     |
|----|------|---------------------------------------------------------------------------------------------------------------------------------------------------------------------------------------------------|-------------------------------------------------------------------------------------------------------------------------------------------------------|--------------------|-------------------------------------------------|-----|
| 10 | 2023 | Valorization of Human Urine with Mixed Microalgae Examined through Population Dynamics, Nutrient Removal, and Biogas Content                                                                      | <a href="https://doi.org/10.3390/su15086922">https://doi.org/10.3390/su15086922</a>                                                                   | Real               | Collected fresh, no indication of stabilization | No  |
| 11 | 2023 | Cyanophycin production in turbidostat cultivation of cyanobacteria under phosphorus limitation on synthetic urine media                                                                           | <a href="https://doi.org/10.1016/j.algal.2023.103143">https://doi.org/10.1016/j.algal.2023.103143</a>                                                 | Synthetic          | Dilute, Hydrolyzed                              | No  |
| 12 | 2023 | N, P, K recovery from hydrolysed urine by Na-chabazite adsorption integrated with ammonia stripping and (K-)struvite precipitation                                                                | <a href="https://doi.org/10.1016/j.scitotenv.2022.159277">https://doi.org/10.1016/j.scitotenv.2022.159277</a>                                         | Synthetic          | Hydrolyzed                                      | Yes |
| 13 | 2023 | Factors influencing the recovery of organic nitrogen from fresh human urine dosed with organic/inorganic acids and concentrated by evaporation in ambient conditions                              | <a href="https://doi.org/10.1016/j.scitotenv.2023.163053">https://doi.org/10.1016/j.scitotenv.2023.163053</a>                                         | Real               | Fresh and Acid stabilized                       | Yes |
| 14 | 2023 | Interfacial solar evaporation toward efficient recovery of clean water and concentration of nutrients from urine with polypyrrole-based photothermal conversion films                             | <a href="https://doi.org/10.1016/j.resconrec.2022.106645">https://doi.org/10.1016/j.resconrec.2022.106645</a>                                         | Synthetic          | Hydrolyzed                                      | Yes |
| 15 | 2023 | Optimization and kinetic modeling of phosphate recovery as struvite by electrocoagulation from source-separated urine                                                                             | <a href="https://link.springer.com/article/10.1007/s11356-022-23446-2">https://link.springer.com/article/10.1007/s11356-022-23446-2</a>               | Real               | Fresh and hydrolyzed                            | Yes |
| 16 | 2023 | Urine and grey water based liquid fertilizer – Production and the response of plants                                                                                                              | <a href="https://doi.org/10.1016/j.jenvman.2023.117248">https://doi.org/10.1016/j.jenvman.2023.117248</a>                                             | Synthetic          | Dilute possibly nitrified                       | No  |
| 17 | 2023 | Norfloxacin degradation in synthetic human urine using nickel converter slag-laterite heterogeneous Electro-Fenton process                                                                        | <a href="https://doi.org/10.1016/j.jwpe.2023.103723">https://doi.org/10.1016/j.jwpe.2023.103723</a>                                                   | Synthetic          | Fresh                                           | No, |
| 18 | 2023 | Human urine: A novel source of phosphorus for vivianite production                                                                                                                                | <a href="https://doi.org/10.1016/j.scitotenv.2023.164517">https://doi.org/10.1016/j.scitotenv.2023.164517</a>                                         | Real and Synthetic | Fresh                                           | Yes |
| 19 | 2023 | Catalytic performance of rGO-Zeolite modified anode in clay biophotovoltaics system for effective urine treatment                                                                                 | <a href="https://doi.org/10.1016/j.ijhydene.2022.09.216">https://doi.org/10.1016/j.ijhydene.2022.09.216</a>                                           | Real               | Fresh                                           | Yes |
| 20 | 2023 | Factors hindering the degradation of pharmaceuticals from human urine in an iron-activated persulfate system                                                                                      | <a href="https://doi.org/10.1016/j.jes.2022.12.022">https://doi.org/10.1016/j.jes.2022.12.022</a>                                                     | Synthetic          | Fresh and hydrolyzed                            | Yes |
| 21 | 2023 | Degradation of 75 organic micropollutants in fresh human urine and water by UV advanced oxidation process                                                                                         | <a href="https://doi.org/10.1016/j.watres.2023.120221">https://doi.org/10.1016/j.watres.2023.120221</a>                                               | Synthetic and real | Fresh                                           | Yes |
| 22 | 2023 | Simultaneous Urea and Phosphate Recovery from Synthetic Urine by Electrochemical Stabilization                                                                                                    | <a href="https://doi.org/10.3390/membranes13080699">https://doi.org/10.3390/membranes13080699</a>                                                     | Synthetic          | Fresh                                           | No  |
| 23 | 2022 | Concentrating stabilized urine with reverse osmosis: How does stabilization method and pre-treatment affect nutrient recovery, flux, and scaling?                                                 | <a href="https://doi.org/10.1016/j.watres.2021.117970">https://doi.org/10.1016/j.watres.2021.117970</a>                                               | Synthetic and real | Acid and base stabilized                        | Yes |
| 24 | 2022 | Energy efficient bioelectro-concentration and recovery system of nutrients from human urine by integrating forward osmosis                                                                        | <a href="https://doi.org/10.1016/j.resconrec.2022.106253">https://doi.org/10.1016/j.resconrec.2022.106253</a>                                         | Synthetic          | Dilute partially hydrolyzed                     | No  |
| 25 | 2022 | Simultaneous nutrient-energy recovery from source-separated urine based on bioelectrically enhanced bipolar membrane-driven in-situ alkali production coupling with gas-permeable membrane system | <a href="https://doi.org/10.1016/j.cej.2021.134161">https://doi.org/10.1016/j.cej.2021.134161</a>                                                     | Synthetic          | Dilute partially hydrolyzed                     | No  |
| 26 | 2022 | Assessment of K-Struvite Precipitation as a Means of Nutrient Recovery from Source Separated Human Urine                                                                                          | <a href="https://doi.org/10.3390/su14031082">https://doi.org/10.3390/su14031082</a>                                                                   | Synthetic          | Unclear                                         | No  |
| 27 | 2022 | Simultaneous recovery of nutrients and power generation from source-separated urine based on bioelectrical coupling with the hydrophobic gas permeable tube system                                | <a href="https://doi.org/10.1016/j.scitotenv.2022.153788">https://doi.org/10.1016/j.scitotenv.2022.153788</a>                                         | Synthetic          | Dilute partially hydrolyzed                     | Yes |
| 28 | 2022 | Unintentional release of antibiotics associated with nutrients recovery from source-separated human urine by biochar                                                                              | <a href="https://doi.org/10.1016/j.chemosphere.2022.134426">https://doi.org/10.1016/j.chemosphere.2022.134426</a>                                     | Real               | Dilute fresh urine (no stabilization)           | Yes |
| 29 | 2022 | A hybrid nanofiltration and reverse osmosis process for urine treatment: Effect on urea recovery and purity                                                                                       | <a href="https://doi.org/10.1016/j.watres.2022.118851">https://doi.org/10.1016/j.watres.2022.118851</a>                                               | Real and Synthetic | Base stabilized                                 | Yes |
| 30 | 2022 | Water and nutrient recovery from stored urine by forward osmosis with an ammonium bicarbonate draw solution                                                                                       | <a href="https://www.frontiersin.org/articles/10.3389/fenvs.2022.937456/full">https://www.frontiersin.org/articles/10.3389/fenvs.2022.937456/full</a> | Real               | Stored hydrolysed urine                         | Yes |
| 31 | 2022 | Donnan dialysis for phosphate recovery from diverted urine                                                                                                                                        | <a href="https://doi.org/10.1016/j.watres.2022.119302">https://doi.org/10.1016/j.watres.2022.119302</a>                                               | Synthetic          | Fresh/and hydrolyzed                            | Yes |
| 32 | 2022 | Nitrogen and phosphorous recycling from human urine by household electrochemical fixed bed in sparsely populated regions                                                                          | <a href="https://doi.org/10.1016/j.watres.2022.118467">https://doi.org/10.1016/j.watres.2022.118467</a>                                               | Synthetic and real | Both were dilute and hydrolyzed                 | Yes |

|    |      |                                                                                                                                            |                                                                                                                                                                             |                |                               |     |
|----|------|--------------------------------------------------------------------------------------------------------------------------------------------|-----------------------------------------------------------------------------------------------------------------------------------------------------------------------------|----------------|-------------------------------|-----|
| 33 | 2022 | A novel mixing mechanism for effective stabilisation of urea in urinals for subsequent nutrient recovery                                   | <a href="https://journals.co.za/doi/abs/10.1016/j.sajce.2022.07.006">https://journals.co.za/doi/abs/10.1016/j.sajce.2022.07.006</a>                                         | Real           | Base stabilized               | Yes |
| 34 | 2022 | Water and nutrients recovery from synthetic source-separated human urine using AGMD                                                        | <a href="https://doi.org/10.1016/j.jece.2022.107176">https://doi.org/10.1016/j.jece.2022.107176</a>                                                                         | Synthetic      | Fresh, acidic, and hydrolyzed | Yes |
| 35 | 2022 | Ammonia recovery and fouling mitigation of hydrolyzed human urine treated by nanofiltration and reverse osmosis                            | <a href="https://pubs.rsc.org/en/content/articlehtml/2022/ew/d1ew00601k">https://pubs.rsc.org/en/content/articlehtml/2022/ew/d1ew00601k</a>                                 | Real           | Real hydrolyzed               | Yes |
| 36 | 2022 | Recovering nutrients and rejecting trace organic compounds in human urine by a forward osmosis–membrane distillation (FO–MD) hybrid system | <a href="https://doi.org/10.2166/wst.2022.311">https://doi.org/10.2166/wst.2022.311</a>                                                                                     | Real           | Fresh                         | No  |
| 37 | 2022 | Microbial fuel cell treatment energy-offset for fertilizer production from human urine                                                     | <a href="https://doi.org/10.1016/j.chemosphere.2022.133594">https://doi.org/10.1016/j.chemosphere.2022.133594</a>                                                           | Synth and real | Hydrolyzed                    | Yes |
| 38 | 2022 | Recovery of ammonium nitrate solution from urine wastewater via novel free nitrous acid (FNA)-mediated two-stage processes                 | <a href="https://doi.org/10.1016/j.cej.2022.135826">https://doi.org/10.1016/j.cej.2022.135826</a>                                                                           | Real           | Hydrolyzed and dilute         | Yes |
| 39 | 2022 | Start-up and performance of a downflow fluidised bed reactor for biological treatment of yellow wastewater and nutrient recovery           | <a href="https://doi.org/10.2166/wst.2022.167">https://doi.org/10.2166/wst.2022.167</a>                                                                                     | Real           | Fresh                         | Yes |
| 40 | 2022 | Stabilization and concentration of nitrogen in synthetic urine with peracetic acid and progressive freeze concentration                    | <a href="https://doi.org/10.1016/j.jece.2022.107768">https://doi.org/10.1016/j.jece.2022.107768</a>                                                                         | Synthetic      | Fresh                         | Yes |
| 41 | 2021 | Resource Recovery from Synthetic Nitrified Urine in the Hydroponic Cultivation of Lettuce ( <i>Lactuca sativa</i> Var. capitata L.)        | <a href="https://doi.org/10.3390/agronomy11112242">https://doi.org/10.3390/agronomy11112242</a>                                                                             | Synth          | Nitrified                     | Yes |
| 42 | 2021 | On-site urine treatment combining Ca(OH) <sub>2</sub> dissolution and dehydration with ambient air                                         | <a href="https://doi.org/10.1016/j.wroa.2021.100124">https://doi.org/10.1016/j.wroa.2021.100124</a>                                                                         | Real           | Real base stabilized          | Yes |
| 43 | 2021 | Phosphate recovery and simultaneous nitrogen removal from urine by electrochemically induced struvite precipitation                        | <a href="https://link.springer.com/article/10.1007/s11356-020-10924-8">https://link.springer.com/article/10.1007/s11356-020-10924-8</a>                                     | Synthetic      | Partially/fully hydrolyzed    | No  |
| 44 | 2021 | Optimised operational parameters for improved nutrient recovery from hydrolysed urine by bio-electroconcentration                          | <a href="https://doi.org/10.1016/j.seppur.2021.119793">https://doi.org/10.1016/j.seppur.2021.119793</a>                                                                     | Synthetic      | Hydrolyzed                    | Yes |
| 45 | 2021 | Demonstration of energy and nutrient recovery from urine by field-scale microbial fuel cell system                                         | <a href="https://doi.org/10.1016/j.procbio.2020.11.014">https://doi.org/10.1016/j.procbio.2020.11.014</a>                                                                   | Real           | Unclear                       | No  |
| 46 | 2021 | Nutrient recovery and microalgae biomass production from urine by membrane photobioreactor at low biomass retention times                  | <a href="https://doi.org/10.1016/j.scitotenv.2021.147423">https://doi.org/10.1016/j.scitotenv.2021.147423</a>                                                               | Real           | Fresh                         | Yes |
| 47 | 2021 | Electrochemical recovery of H <sub>2</sub> and nutrients (N, P) from synthetic source separate urine water                                 | <a href="https://doi.org/10.1016/j.chemosphere.2020.129361">https://doi.org/10.1016/j.chemosphere.2020.129361</a>                                                           | Synthetic      | Dilute partially hydrolyzed   | No  |
| 48 | 2021 | Fertiliser recovery from source-separated urine via membrane bioreactor and heat localized solar evaporation                               | <a href="https://doi.org/10.1016/j.watres.2021.117810">https://doi.org/10.1016/j.watres.2021.117810</a>                                                                     | Real           | Hydrolyzed                    | Yes |
| 49 | 2021 | Ammonium and potassium removal from undiluted and diluted hydrolyzed urine using natural zeolites                                          | <a href="https://doi.org/10.1016/j.chemosphere.2020.128849">https://doi.org/10.1016/j.chemosphere.2020.128849</a>                                                           | Real           | Hydrolyzed                    | Yes |
| 50 | 2021 | Sustainable recovery of plant essential Nitrogen and Phosphorus from human urine using industrial coal fly ash                             | <a href="https://doi.org/10.1016/j.eti.2021.101985">https://doi.org/10.1016/j.eti.2021.101985</a>                                                                           | Synth          | Fresh                         | No  |
| 51 | 2021 | Nutrients recovery from urine through struvite formation using lab-scale fluidized-bed homogeneous crystallization reactor                 | <a href="https://stdjsee.scienceandtechnology.com.vn/index.php/stdjsee/article/view/625">https://stdjsee.scienceandtechnology.com.vn/index.php/stdjsee/article/view/625</a> | Real           | Fresh                         | No  |
| 52 | 2021 | Electro-concentration of urine designed for separation of sodium from nitrogen                                                             | <a href="https://doi.org/10.1016/j.seppur.2021.119275">https://doi.org/10.1016/j.seppur.2021.119275</a>                                                                     | Synthetic      | Ureolyzed/Hydrolyzed          | Yes |
| 53 | 2021 | Probing the degradation of pharmaceuticals in urine using MFC and studying their removal efficiency by UPLC-MS/MS                          | <a href="https://doi.org/10.1016/j.jpha.2020.04.006">https://doi.org/10.1016/j.jpha.2020.04.006</a>                                                                         | Real           | Collected fresh               | No  |

|    |      |                                                                                                                                                                              |                                                                                                                                                                                                                                           |                    |                                      |     |
|----|------|------------------------------------------------------------------------------------------------------------------------------------------------------------------------------|-------------------------------------------------------------------------------------------------------------------------------------------------------------------------------------------------------------------------------------------|--------------------|--------------------------------------|-----|
| 54 | 2021 | Urea recovery from stabilized urine using a novel ethanol evaporation and recrystallization process                                                                          | <a href="https://doi.org/10.1016/j.cej.2021.100174">https://doi.org/10.1016/j.cej.2021.100174</a>                                                                                                                                         | Synthetic and real | Base stabilized                      | Yes |
| 55 | 2021 | Recovery of high quality water from human urine using a novel vertical up-flow forward osmosis reactor                                                                       | <a href="https://doi.org/10.1016/j.seta.2021.101124">https://doi.org/10.1016/j.seta.2021.101124</a>                                                                                                                                       | Real               | Fresh                                | Yes |
| 56 | 2021 | Calcium removal from stabilized human urine by air and CO2 bubbling                                                                                                          | <a href="https://doi.org/10.1016/j.watres.2021.117467">https://doi.org/10.1016/j.watres.2021.117467</a>                                                                                                                                   | Real               | Base stabilized                      | Yes |
| 57 | 2021 | Precipitation to remove calcium ions from stabilized human urine as a pre-treatment for reverse osmosis                                                                      | <a href="https://doi.org/10.2166/wst.2021.479">https://doi.org/10.2166/wst.2021.479</a>                                                                                                                                                   | Real and Synthetic | Base stabilized                      | Yes |
| 58 | 2021 | Highly efficient phosphorus and potassium recovery from urine via crystallization process in a fluidized bed reactor system                                                  | <a href="https://doi.org/10.1016/j.jece.2021.105623">https://doi.org/10.1016/j.jece.2021.105623</a>                                                                                                                                       | Synthetic          | Dilute hydrolyzed                    | No  |
| 59 | 2021 | Electrochemical system for selective oxidation of organics over ammonia in urine                                                                                             | <a href="https://pubs.rsc.org/en/content/articlehtml/2021/ew/d0ew01057j">https://pubs.rsc.org/en/content/articlehtml/2021/ew/d0ew01057j</a>                                                                                               | Real and Synthetic | Ureolyzed/Hydrolyzed                 | Yes |
| 60 | 2021 | Struvite recovery from human urine in inverse fluidized bed reactor and evaluation of its fertilizing potential on the growth of <i>Arachis hypogaea</i>                     | <a href="https://doi.org/10.1016/j.jece.2020.104965">https://doi.org/10.1016/j.jece.2020.104965</a>                                                                                                                                       | Synthetic          | Fresh                                | No  |
| 61 | 2021 | Electrochemical In Situ pH Control Enables Chemical-Free Full Urine Nitrification with Concomitant Nitrate Extraction                                                        | <a href="https://pubs.acs.org/doi/full/10.1021/acs.est.1c00041">https://pubs.acs.org/doi/full/10.1021/acs.est.1c00041</a>                                                                                                                 | Real               | Dilute, electrochemically stabilized | Yes |
| 62 | 2021 | Ammonia capture from human urine to harvest liquid N-P compound fertilizer by a submerged hollow fiber membrane contactor: Performance and fertilizer analysis               | <a href="https://doi.org/10.1016/j.scitotenv.2020.144478">https://doi.org/10.1016/j.scitotenv.2020.144478</a>                                                                                                                             | Synthetic          | Hydrolyzed                           | Yes |
| 63 | 2021 | Removal of pharmaceuticals from nitrified urine                                                                                                                              | <a href="https://doi.org/10.1016/j.chemosphere.2021.130870">https://doi.org/10.1016/j.chemosphere.2021.130870</a>                                                                                                                         | Synthetic          | Nitrified                            | Yes |
| 64 | 2021 | Critical flux on a submerged membrane bioreactor for nitrification of source separated urine                                                                                 | <a href="https://doi.org/10.1016/j.psep.2021.07.039">https://doi.org/10.1016/j.psep.2021.07.039</a>                                                                                                                                       | Real               | Hydrolyzed                           | Yes |
| 65 | 2021 | Stabilization of Urea for Recovery from Source-Separated Urine Using Electrochemically Synthesized Hydrogen Peroxide                                                         | <a href="https://pubs.acs.org/doi/full/10.1021/acsestengg.1c00194">https://pubs.acs.org/doi/full/10.1021/acsestengg.1c00194</a>                                                                                                           | synthetic          | Hydrolyzed                           | Yes |
| 66 | 2021 | Removal of pharmaceuticals from human urine during storage, aerobic biological treatment, and activated carbon adsorption to produce a safe fertilizer                       | <a href="https://doi.org/10.1016/j.resconrec.2020.105341">https://doi.org/10.1016/j.resconrec.2020.105341</a>                                                                                                                             | Real               | Hydrolyzed                           | Yes |
| 67 | 2021 | Alkaline Dehydration of Human Urine Collected in Source-Separated Sanitation Systems Using Magnesium Oxide                                                                   | <a href="https://www.frontiersin.org/articles/10.3389/fenvs.2020.619901/full?utm_source=dlvr.it&amp;utm_medium=twitter">https://www.frontiersin.org/articles/10.3389/fenvs.2020.619901/full?utm_source=dlvr.it&amp;utm_medium=twitter</a> | real               | Base stabilized                      | Yes |
| 68 | 2021 | Drying fresh human urine in magnesium-doped alkaline substrates: Capture of free ammonia, inhibition of enzymatic urea hydrolysis & minimisation of chemical urea hydrolysis | <a href="https://doi.org/10.1016/j.cej.2021.131026">https://doi.org/10.1016/j.cej.2021.131026</a>                                                                                                                                         | real               | Base stabilized                      | Yes |
| 69 | 2020 | Field Testing a Pilot-Scale System for Alkaline Dehydration of Source-Separated Human Urine: A Case Study in Finland                                                         | <a href="https://www.frontiersin.org/articles/10.3389/fenvs.2020.570637/full">https://www.frontiersin.org/articles/10.3389/fenvs.2020.570637/full</a>                                                                                     | Real               | Base stabilized                      | Yes |
| 70 | 2020 | Preparation and characterization of a decentralized modular yellow water nutrient recovery system                                                                            | <a href="https://doi.org/10.1016/j.jenvman.2020.111345">https://doi.org/10.1016/j.jenvman.2020.111345</a>                                                                                                                                 | Synthetic          | Partially hydrolyzed                 | No  |
| 71 | 2020 | Biological nutrient recovery from human urine by enriching mixed microalgal consortium for biodiesel production                                                              | <a href="https://doi.org/10.1016/j.jenvman.2020.110111">https://doi.org/10.1016/j.jenvman.2020.110111</a>                                                                                                                                 | Real               | Fresh dilute                         | Yes |
| 72 | 2020 | A green method for the simultaneous recovery of phosphate and potassium from hydrolyzed urine as value-added fertilizer using wood waste                                     | <a href="https://doi.org/10.1016/j.resconrec.2020.104793">https://doi.org/10.1016/j.resconrec.2020.104793</a>                                                                                                                             | Real and Synthetic | Hydrolyzed                           | Yes |
| 73 | 2020 | Biochar-activated peroxydisulfate as an effective process to eliminate pharmaceutical and metabolite in hydrolyzed urine                                                     | <a href="https://doi.org/10.1016/j.watres.2020.115809">https://doi.org/10.1016/j.watres.2020.115809</a>                                                                                                                                   | Synthetic          | Hydrolyzed                           | Yes |
| 74 | 2020 | A five-stage treatment train for water recovery from urine and shower water for long-term human Space missions                                                               | <a href="https://doi.org/10.1016/j.desal.2020.114634">https://doi.org/10.1016/j.desal.2020.114634</a>                                                                                                                                     | Real               | Nitrified                            | Yes |

|    |      |                                                                                                                                                                             |                                                                                                                                       |           |                           |     |
|----|------|-----------------------------------------------------------------------------------------------------------------------------------------------------------------------------|---------------------------------------------------------------------------------------------------------------------------------------|-----------|---------------------------|-----|
| 75 | 2020 | Stabilization of source-separated urine by heat-activated peroxydisulfate                                                                                                   | <a href="https://doi.org/10.1016/j.scitotenv.2020.142213">https://doi.org/10.1016/j.scitotenv.2020.142213</a>                         | real      | hydroluzed                | Yes |
| 76 | 2020 | Electrochemically Induced Precipitation Enables Fresh Urine Stabilization and Facilitates Source Separation                                                                 | <a href="https://pubs.acs.org/doi/full/10.1021/acs.est.9b06804">https://pubs.acs.org/doi/full/10.1021/acs.est.9b06804</a>             | Real      | Fresh                     | Yes |
| 77 | 2020 | Alkaline dehydration of source-separated fresh human urine: Preliminary insights into using different dehydration temperature and media                                     | <a href="https://doi.org/10.1016/j.scitotenv.2020.139313">https://doi.org/10.1016/j.scitotenv.2020.139313</a>                         | Real      | Base stabilized           | Yes |
| 78 | 2020 | Comparison of the use of functional porous organic polymer (POP) and natural material zeolite for nitrogen removal and recovery from source-separated urine                 | <a href="https://doi.org/10.1016/j.jece.2020.104296">https://doi.org/10.1016/j.jece.2020.104296</a>                                   | Synthetic | Hydrolyzed                | Yes |
| 79 | 2020 | Impact of acetic acid addition on nitrogen speciation and bacterial communities during urine collection and storage                                                         | <a href="https://doi.org/10.1016/j.scitotenv.2020.141010">https://doi.org/10.1016/j.scitotenv.2020.141010</a>                         | Real      | Acid Stabilized           | Yes |
| 80 | 2020 | Ammonia Recovery from Hydrolyzed Human Urine by Forward Osmosis with Acidified Draw Solution                                                                                | <a href="https://pubs.acs.org/doi/full/10.1021/acs.est.0c02751">https://pubs.acs.org/doi/full/10.1021/acs.est.0c02751</a>             | Real      | Hydrolyzed                | Yes |
| 81 | 2020 | Rejection of nitrogen species in real fresh and hydrolyzed human urine by reverse osmosis and nanofiltration                                                                | <a href="https://doi.org/10.1016/j.jece.2020.103993">https://doi.org/10.1016/j.jece.2020.103993</a>                                   | Real      | Fresh and hydrolyzed      | Yes |
| 82 | 2020 | Removal of pharmaceuticals from nitrified urine by adsorption on granular activated carbon                                                                                  | <a href="https://doi.org/10.1016/j.wroa.2020.100057">https://doi.org/10.1016/j.wroa.2020.100057</a>                                   | Real      | Partially nitrified       | Yes |
| 83 | 2020 | Sanitation and dewatering of human urine via membrane bioreactor and membrane distillation and its reuse for fertigation                                                    | <a href="https://doi.org/10.1016/j.jclepro.2020.122390">https://doi.org/10.1016/j.jclepro.2020.122390</a>                             | Real      | Hydrolyzed                | Yes |
| 84 | 2020 | Bio-electrochemical COD removal for energy-efficient, maximum and robust nitrogen recovery from urine through membrane aerated nitrification                                | <a href="https://doi.org/10.1016/j.watres.2020.116223">https://doi.org/10.1016/j.watres.2020.116223</a>                               | Real      | Dilute base hydrolyzed    | Yes |
| 85 | 2020 | Energy recovery through reverse electrodialysis: Harnessing the salinity gradient from the flushing of human urine                                                          | <a href="https://doi.org/10.1016/j.watres.2020.116320">https://doi.org/10.1016/j.watres.2020.116320</a>                               | Real      | Yes                       | Yes |
| 86 | 2020 | Selective Recovery of Phosphorus from Synthetic Urine Using Flow-Electrode Capacitive Deionization (FCDI)-Based Technology                                                  | <a href="https://pubs.acs.org/doi/full/10.1021/acsestwater.0c00065">https://pubs.acs.org/doi/full/10.1021/acsestwater.0c00065</a>     | Synthetic | Unclear                   | No  |
| 87 | 2020 | Phosphorus and potassium recovery from human urine using a fluidized bed homogeneous crystallization (FBHC) process                                                         | <a href="https://doi.org/10.1016/j.cej.2019.123282">https://doi.org/10.1016/j.cej.2019.123282</a>                                     | Synthetic | Hydrolyzed                | Yes |
| 88 | 2020 | Novel Isothermal Membrane Distillation with Acidic Collector for Selective and Energy-Efficient Recovery of Ammonia from Urine                                              | <a href="https://pubs.acs.org/doi/full/10.1021/acssuschemeng.0c00643">https://pubs.acs.org/doi/full/10.1021/acssuschemeng.0c00643</a> | Synthetic | Hydrolyzed                | Yes |
| 89 | 2020 | Recovery of ammonium nitrogen from human urine by an open-loop hollow fiber membrane contactor                                                                              | <a href="https://doi.org/10.1016/j.seppur.2020.116579">https://doi.org/10.1016/j.seppur.2020.116579</a>                               | Synthetic | Hydrolyzed                | Yes |
| 90 | 2020 | Effect of storage on physicochemical characteristics of urine for phosphate and ammonium recovery as struvite                                                               | <a href="https://doi.org/10.1016/j.ibiod.2020.105053">https://doi.org/10.1016/j.ibiod.2020.105053</a>                                 | Real      | Fresh and then hydrolyzed | Yes |
| 91 | 2020 | Recovery of monovalent mineral salts from urine in controlled ecological life support system by nanofiltration: Feasibility study                                           | <a href="https://doi.org/10.1016/j.desal.2020.114344">https://doi.org/10.1016/j.desal.2020.114344</a>                                 | Synthetic | Fresh                     | No  |
| 92 | 2020 | The recovery of phosphorus from source-separated urine by repeatedly usable magnetic Fe <sub>3</sub> O <sub>4</sub> @ZrO <sub>2</sub> nanoparticles under acidic conditions | <a href="https://doi.org/10.1016/j.envint.2019.105322">https://doi.org/10.1016/j.envint.2019.105322</a>                               | Synthetic | Hydrolyzed                | Yes |
| 93 | 2020 | Phosphorous removal and high-purity struvite recovery from hydrolyzed urine with spontaneous electricity production in Mg-air fuel cell                                     | <a href="https://doi.org/10.1016/j.cej.2019.123517">https://doi.org/10.1016/j.cej.2019.123517</a>                                     | Synthetic | Hydrolyzed                | Yes |
| 94 | 2019 | Efficient nutrient recovery/removal from real source-separated urine by coupling vacuum thermal stripping with activated sludge processes                                   | <a href="https://doi.org/10.1016/j.jclepro.2019.02.181">https://doi.org/10.1016/j.jclepro.2019.02.181</a>                             | Real      | Hydrolyzed                | Yes |
| 95 | 2019 | Nutrient recovery and microbial diversity in human urine fed microbial fuel cell                                                                                            | <a href="https://doi.org/10.2166/wst.2019.089">https://doi.org/10.2166/wst.2019.089</a>                                               | Real      | Fresh (not stabilized)    | Yes |
| 96 | 2019 | Self-Powered Bioelectrochemical Nutrient Recovery for Fertilizer Generation from Human Urine                                                                                | <a href="https://doi.org/10.3390/su11195490">https://doi.org/10.3390/su11195490</a>                                                   | Real      | Hydrolyzed                | Yes |
| 97 | 2019 | Three-stage treatment for nitrogen and phosphorus recovery from human urine: Hydrolysis, precipitation and vacuum stripping                                                 | <a href="https://doi.org/10.1016/j.jenvman.2019.109435">https://doi.org/10.1016/j.jenvman.2019.109435</a>                             | Real      | Hydrolyzed                | Yes |

|     |      |                                                                                                                                                                                      |                                                                                                                                                           |                    |                                          |      |
|-----|------|--------------------------------------------------------------------------------------------------------------------------------------------------------------------------------------|-----------------------------------------------------------------------------------------------------------------------------------------------------------|--------------------|------------------------------------------|------|
| 98  | 2019 | Anaerobic ureolysis of source-separated urine for NH <sub>3</sub> recovery enables direct removal of divalent ions at the toilet                                                     | <a href="https://doi.org/10.1016/j.watres.2018.10.021">https://doi.org/10.1016/j.watres.2018.10.021</a>                                                   | Real               | Collected fresh and then hydrolyzed      | Yes  |
| 99  | 2019 | Recovery of nitrogen and phosphorus from human urine using membrane and precipitation process                                                                                        | <a href="https://doi.org/10.1016/j.jenvman.2019.06.046">https://doi.org/10.1016/j.jenvman.2019.06.046</a>                                                 | Real               | Hydrolyzed                               | No   |
| 100 | 2019 | Optimisation of a forward osmosis and membrane distillation hybrid system for the treatment of source-separated urine                                                                | <a href="https://doi.org/10.1016/j.seppur.2018.11.003">https://doi.org/10.1016/j.seppur.2018.11.003</a>                                                   | Synthetic          | Fresh and stored                         | Yes  |
| 101 | 2019 | Comparison of different K-struvite crystallization processes for simultaneous potassium and phosphate recovery from source-separated urine                                           | <a href="https://doi.org/10.1016/j.scitotenv.2018.09.232">https://doi.org/10.1016/j.scitotenv.2018.09.232</a>                                             | Real               | Based stabilized                         | Yes  |
| 102 | 2019 | Multi-functional microbial fuel cells for power, treatment and electro-osmotic purification of urine                                                                                 | <a href="https://doi.org/10.1002/jctb.5792">https://doi.org/10.1002/jctb.5792</a>                                                                         | Real               | Hydrolyzed                               | No   |
| 103 | 2019 | Preliminary results for start-up and adaptation of an EGSB reactor for valorization and treatment of fresh urine                                                                     | doi: 10.5004/dwt.2019.24935                                                                                                                               | Real               | Partially hydrolyzed                     | Yes  |
| 104 | 2019 | Recovery of phosphates as struvite from urine-diverting toilets: optimization of pH, Mg:PO <sub>4</sub> ratio and contact time to improve precipitation yield and crystal morphology | <a href="https://doi.org/10.2166/wst.2019.371">https://doi.org/10.2166/wst.2019.371</a>                                                                   | Synthetic          | Hydrolyzed (no urea in the recipe)       | No   |
| 105 | 2019 | Urea recovery from fresh human urine by forward osmosis and membrane distillation (FO–MD                                                                                             | <a href="https://pubs.rsc.org/en/content/articlehtml/2019/ew/c9ew00720b">https://pubs.rsc.org/en/content/articlehtml/2019/ew/c9ew00720b</a>               | Real and synthetic | Base and acid stabilized                 | Yes  |
| 106 | 2019 | Microalgae grow on source separated human urine in Nordic climate: Outdoor pilot-scale cultivation                                                                                   | <a href="https://doi.org/10.1016/j.jenvman.2019.02.074">https://doi.org/10.1016/j.jenvman.2019.02.074</a>                                                 | Real               | Hyrolzed                                 | Yes  |
| 107 | 2019 | Techno-economic feasibility of recovering phosphorus, nitrogen and water from dilute human urine via forward osmosis                                                                 | <a href="https://doi.org/10.1016/j.watres.2018.11.056">https://doi.org/10.1016/j.watres.2018.11.056</a>                                                   | Real               | Fresh                                    | Yes  |
| 108 | 2019 | Optimization studies on the production of struvite from human urine – waste into value                                                                                               | <a href="https://www.deswater.com/DWT_articles/vol_155_papers/155_2019_134.pdf">https://www.deswater.com/DWT_articles/vol_155_papers/155_2019_134.pdf</a> | Real and synthetic | Fresh                                    | No   |
| 109 | 2019 | Optimization of algae production on urine                                                                                                                                            | <a href="https://doi.org/10.1016/j.algal.2019.101667">https://doi.org/10.1016/j.algal.2019.101667</a>                                                     | Real and synthetic | Fresh                                    | No   |
| 110 | 2019 | NUTRIENT REMOVAL FROM HUMAN URINE BY CHEMICAL PRECIPITATION                                                                                                                          | <a href="https://www.cabdirect.org/cabdirect/abstract/20193484952">https://www.cabdirect.org/cabdirect/abstract/20193484952</a>                           | real               | Hydrolyzed                               | Yes  |
| 111 | 2019 | Water recovery from hydrolysed human urine samples via direct contact membrane distillation using PVDF/PTFE membrane                                                                 | <a href="https://doi.org/10.1016/j.seppur.2018.10.035">https://doi.org/10.1016/j.seppur.2018.10.035</a>                                                   | Real               | hydrolyzed                               | Yes  |
| 112 | 2019 | Alleviating Na <sup>+</sup> effect on phosphate and potassium recovery from synthetic urine by K-struvite crystallization using different magnesium sources                          | <a href="https://doi.org/10.1016/j.scitotenv.2018.11.259">https://doi.org/10.1016/j.scitotenv.2018.11.259</a>                                             | Snythetic          | Hydrolyzed urine after ammonia stripping | Yes  |
| 113 | 2019 | P-recovery in a pilot-scale struvite crystallisation reactor for source separated urine systems using seawater and magnesium chloride as magnesium sources                           | <a href="https://doi.org/10.1016/j.scitotenv.2019.03.485">https://doi.org/10.1016/j.scitotenv.2019.03.485</a>                                             | Synthetic          | Stored hydrolysed urine                  | Yes  |
| 114 | 2019 | Membrane stripping enables effective electrochemical ammonia recovery from urine while retaining microorganisms and micropollutants                                                  | <a href="https://doi.org/10.1016/j.watres.2018.11.072">https://doi.org/10.1016/j.watres.2018.11.072</a>                                                   | Real               | Hydrolyzed                               | Yes  |
| 115 | 2019 | Manufacturing bio-bricks using microbial induced calcium carbonate precipitation and human urine                                                                                     | <a href="https://doi.org/10.1016/j.watres.2019.05.069">https://doi.org/10.1016/j.watres.2019.05.069</a>                                                   | Real               | Base stsbilized                          | Yes  |
| 116 | 2019 | Human urine as a forward osmosis draw solution for the application of microalgae dewatering                                                                                          | <a href="https://doi.org/10.1016/j.jhazmat.2019.06.001">https://doi.org/10.1016/j.jhazmat.2019.06.001</a>                                                 | Real and synthetic | Fresh and hydrolyzed                     | Yes  |
| 117 | 2019 | Optimizing the modification of wood waste biochar via metal oxides to remove and recover phosphate from human urine                                                                  | <a href="https://link.springer.com/article/10.1007/s10653-017-9986-6">https://link.springer.com/article/10.1007/s10653-017-9986-6</a>                     | Real               | Hydrolyzed                               | Yess |
| 118 | 2019 | Oxidation of Pharmaceuticals by Ferrate(VI) in Hydrolyzed Urine: Effects of Major Inorganic Constituents                                                                             | <a href="https://pubs.acs.org/doi/full/10.1021/acs.est.9b00006">https://pubs.acs.org/doi/full/10.1021/acs.est.9b00006</a>                                 | Synthetic          | Hydrolyzed                               | Yes  |
| 119 | 2019 | Urine nitrification with a synthetic microbial community                                                                                                                             | <a href="https://doi.org/10.1016/j.syapm.2019.126021">https://doi.org/10.1016/j.syapm.2019.126021</a>                                                     | Synthetic          | Hydrolyzed                               | Yes  |

|     |             |                                                                                     |                                                                                                           |      |                      |     |
|-----|-------------|-------------------------------------------------------------------------------------|-----------------------------------------------------------------------------------------------------------|------|----------------------|-----|
| 120 | <b>2019</b> | Phosphorus recovery from urine using cooling water system effluent as a precipitant | <a href="https://doi.org/10.1016/j.jenvman.2019.05.057">https://doi.org/10.1016/j.jenvman.2019.05.057</a> | Real | Fredh and hydrolysed | Yes |
|-----|-------------|-------------------------------------------------------------------------------------|-----------------------------------------------------------------------------------------------------------|------|----------------------|-----|
